# Supplementary material for: Evaluating Ylehd, a recombinant epoxide hydrolase from Yarrowia lipolytica as a potential biocatalyst for the resolution of benzyl glycidyl ether
Source: Royal Society of Chemistry journal article supplement (doi:10.1039/c8ra00628h), 2018-01-01
Supplement: c8ra00628h1.pdf [file c8ra00628h1.pdf]

## Evaluating Ylehd, a recombinant epoxide hydrolase from *Yarrowia lipolytica* as a potential biocatalyst for resolution of benzyl glycidyl ether

Chandrika Bendigiri<sup>a</sup>, K. Harini<sup>c</sup>, Sajal Yenkar<sup>a</sup>, Smita Zinjarde<sup>a</sup>, R.Sowdhamini<sup>c</sup> and Ameeta RaviKumar<sup>a,b\*</sup>

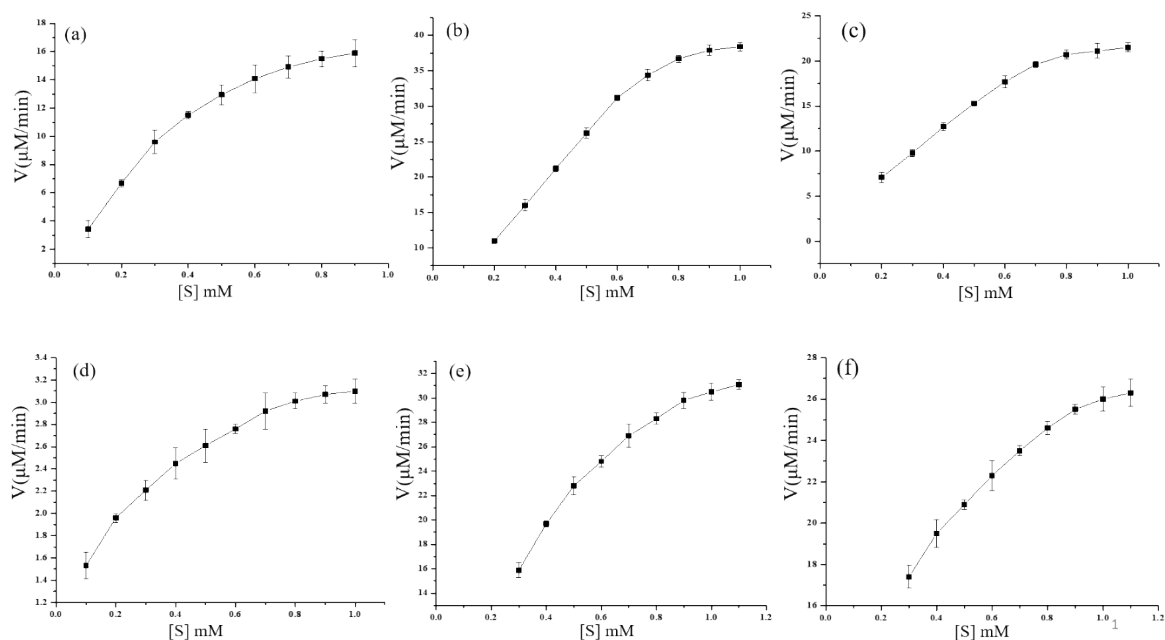

Fig. S1: Substrate saturation plots

Curves indicate the substrate saturation of Ylehd with rac-PGE(a), (R)-PGE(b), (S)-PGE(c), rac-BGE(d), (R)-BGE(e) and (S)-BGE(f)

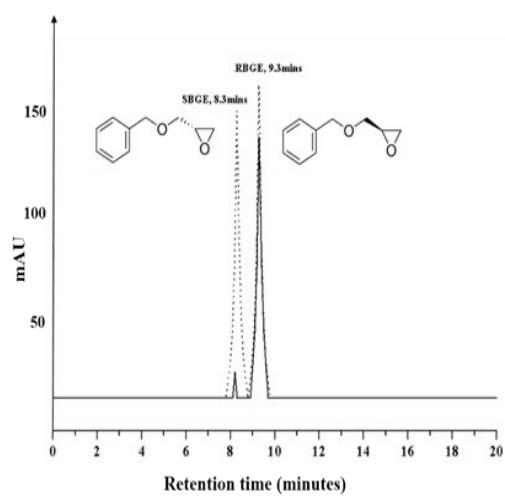

Figure S2: Resolution of BGE

Racemic BGE(dotted), Racemic BGE +Ylehd after 20 minutes of reaction(solid)

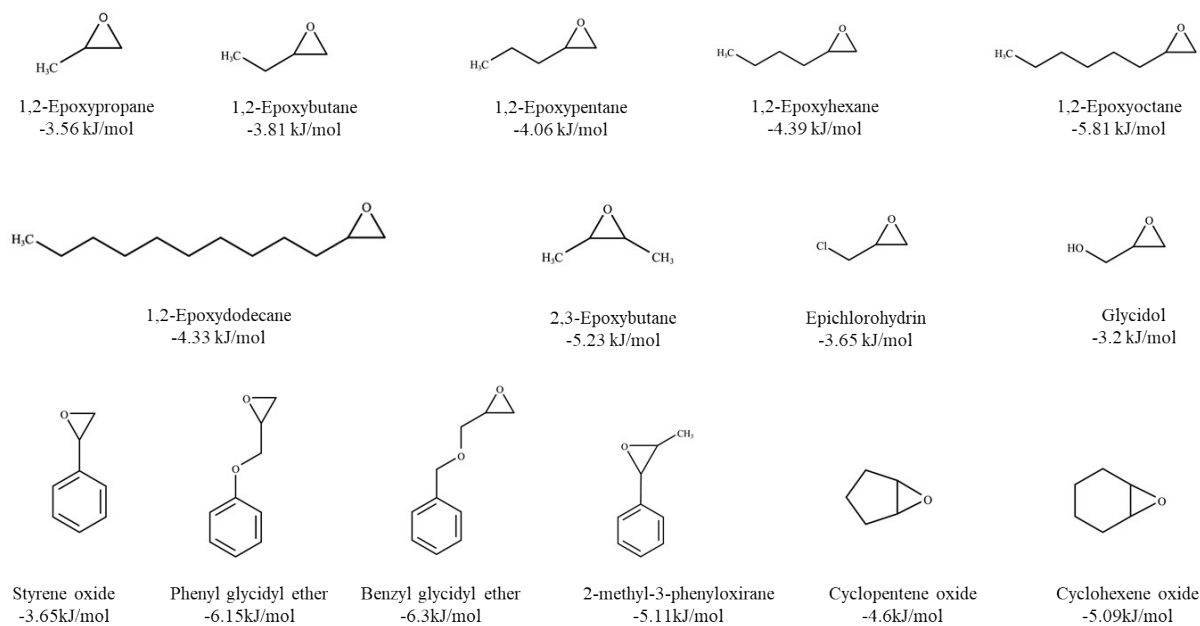

Fig. S3: Binding energy of compounds docked with Ylehd

3D coordinates of ligands were downloaded from Pubchem and docked flexibly with Ylehd protein model. Pubchem CID numbers are serially given as follows: 6378, 7834, 13853, 15036, 18126, 17858, 30664, 7835, 11164, 7276, 31217, 94247 and 12339.

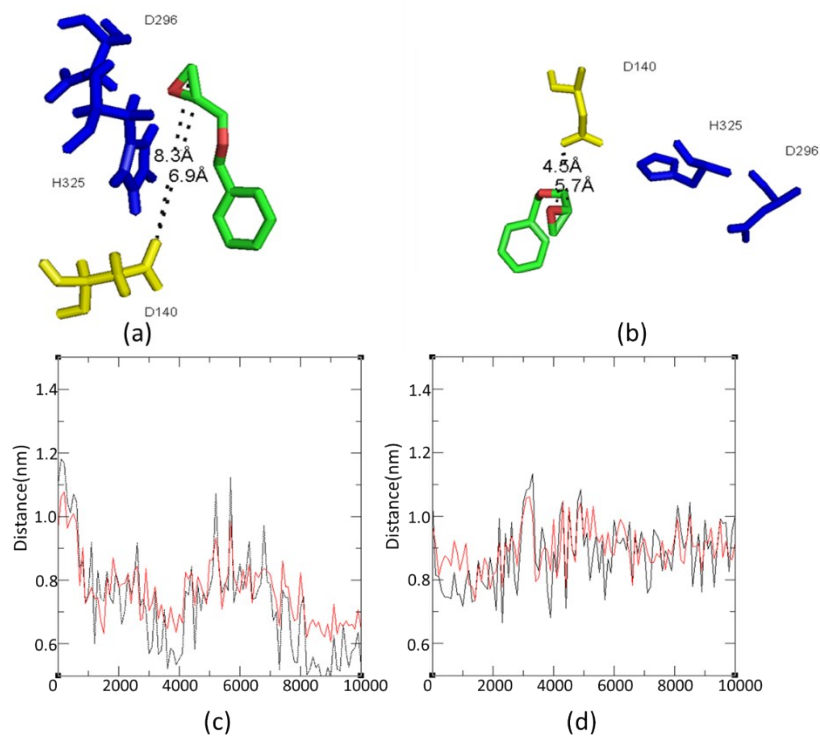

Fig. S4: Distance between nucleophile and ligand

(a,b) Distance between nucleophile D140 and carbon atoms of the oxirane ring of *R*-BGE(a) and *S*-BGE(b) bound to Ylehd model after docking and energy minimisation.

(c,d) Distance trajectories for C1(red) and C2(black) from D140 in hydrated active site pocket of Ylehd bound to *R*-BGE(c) and *S*-BGE(d) during the course of simulations.
